# Supplementary material
Source: HighWire-hosted journal article supplement (https://jnm.snmjournals.org/highwire/filestream/94560/field_highwire_adjunct_files/0/126615_Supplemental_Data.pdf)
Supplement: 126615_Supplemental_Data.pdf [file 126615_Supplemental_Data.pdf]

|                       | <sup>18</sup> F-FMISO | <sup>18</sup> F-HX4 | <sup>18</sup> F-FAZA | <sup>64</sup> Cu-ATSM |
|-----------------------|-----------------------|---------------------|----------------------|-----------------------|
| <sup>18</sup> F-FMISO | -                     | 0.306               | 0.410                | 0.022*                |
| <sup>18</sup> F-HX4   | 0.306                 | -                   | 0.599                | 0.0022*               |
| <sup>18</sup> F-FAZA  | 0.410                 | 0.599               | -                    | 0.007*                |
| <sup>64</sup> Cu-ATSM | 0.0216*               | 0.0022*             | 0.007*               | -                     |

Supplemental Table 1. P-values obtained from 2-sample unequal variance t-test, comparing tumor/muscle ratios obtained from PET images from each tracer, given in table 1. \* denotes  $p < 0.05$ .

(i)

| Tracer | CA9      |       | Pimonidazole |       | Hoechst  |       |
|--------|----------|-------|--------------|-------|----------|-------|
|        | gradient | r     | gradient     | r     | gradient | r     |
| FAZA   | positive | 0.140 | positive     | 0.122 | negative | 0.004 |
| FMISO  | positive | 0.433 | positive     | 0.398 | negative | 0.387 |
| HX4    | positive | 0.238 | positive     | 0.324 | negative | 0.424 |
| ATSM   | negative | 0.158 | negative     | 0.110 | positive | 0.077 |

(ii)

| Cell line | CA9      |       | Pimonidazole |       | Hoechst  |       |
|-----------|----------|-------|--------------|-------|----------|-------|
|           | gradient | r     | gradient     | r     | gradient | r     |
| HCT116    | negative | 0.022 | positive     | 0.052 | positive | 0.115 |
| HT29      | negative | 0.211 | negative     | 0.256 | positive | 0.030 |
| SQ20b     | negative | 0.095 | negative     | 0.276 | positive | 0.333 |

Supplemental Table 2. Correlation coefficients (r) and line gradient values derived from raw pixel data used to generate the re-binned scatterplots shown in figures 5 (i) and 6 (ii) respectively.

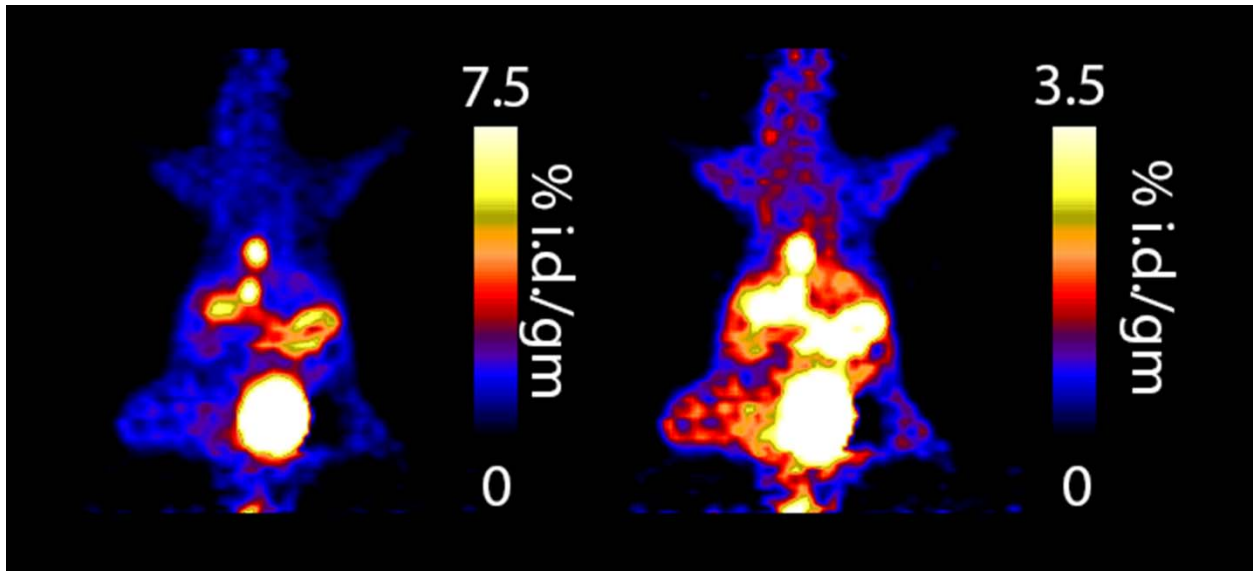

Supplemental Figure 1. Tumor uptake of <sup>18</sup>F-FAZA in a SQ20b murine xenograft. The left panel is also shown in figure 1. Right panels shows a re-windowed PET image (to maximum 3.5% i.d./g) allowing visualization of tumor uptake of <sup>18</sup>F-FAZA.

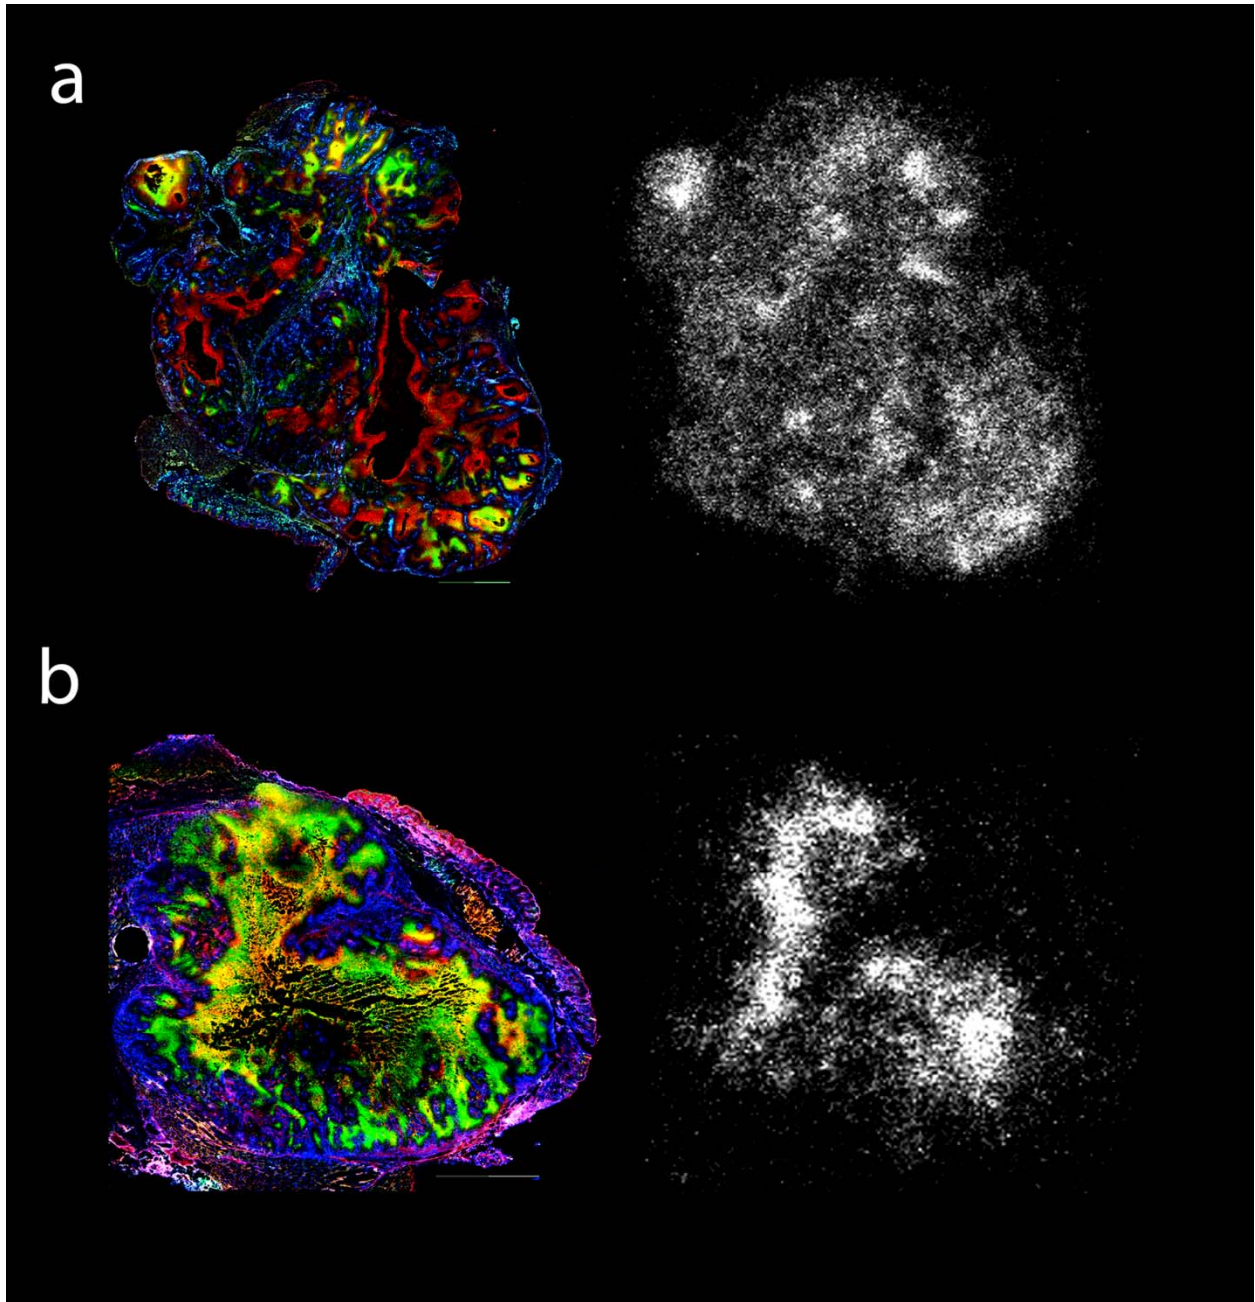

Supplemental Figure 2. Distribution of  $^{18}\text{F}$ -FAZA (top) and  $^{18}\text{F}$ -HX4 (bottom) versus immunofluorescence makers in SQ20b murine xenografts. Registered 3-color immunofluorescence images and corresponding autoradiography from representative sections are shown. Re-binned scatterplots derived from these images are shown in figure 5, panels (b) and (c) respectively.
